# Supplementary material for: Metabolic and Blood Pressure Effects of Walnut Supplementation in a Mouse Model of the Metabolic Syndrome
Source: MDPI journal article supplement (doi:10.3390/nu9070722), 2017-07-07
Supplement: s1 [file s1]

**Table S1: Control Diet Composition as provided by the manufacturer (Specialty Feeds, Glen Forrest, Western Australia) and estimated key macronutrients in the walnut diet (0.3% walnuts).** Addition of walnuts did not change Vitamin content from standard diet.

Ingredients: Wheat, barley, Lupins, Soya meal, fish meal, Mixed vegetable oils, Canola oil, Salt, Calcium carbonate, Dicalcium phosphate, Magnesium oxide, and a Vitamin and trace mineral premix.

| <b>Nutritional Parameter</b>             | <b>Standard Diet</b> | <b>Standard Diet including Walnuts</b> |
|------------------------------------------|----------------------|----------------------------------------|
| Protein                                  | 20.00% wt            | 19.00%                                 |
| Total Fat                                | 4.80% wt             | 4.98%                                  |
| Total Carbohydrate                       | 59.40% wt            | 59.26%                                 |
| Digestible Energy                        | 14.00 MJ/kg          | 14.04 MJ/kg                            |
| L-Arginine                               | No data              | 19.4 mg/kg                             |
| <b>Calculated Fatty Acid Composition</b> |                      |                                        |
| Myristic Acid 14:0                       | 0.03%                | 0.03%                                  |
| Palmitic Acid 16:0                       | 0.50%                | 0.52%                                  |
| Stearic Acid 18:0                        | 0.14%                | 0.15%                                  |
| Palmitoleic Acid 16:1                    | 0.01%                | 0.01%                                  |
| Oleic Acid 18:1                          | 1.90%                | 1.96%                                  |
| Gadoleic Acid 20:1                       | 0.03%                | 0.03%                                  |
| Linoleic Acid 18:2 n6                    | 1.30%                | 1.47%                                  |
| $\alpha$ Linolenic Acid 18:3 n3          | 0.30%                | 0.33%                                  |
| Arachadonic Acid 20:4 n6                 | 0.01%                | 0.01%                                  |
| EPA 20:5 n3                              | 0.02%                | No data                                |
| DHA 22:6 n3                              | 0.05%                | No data                                |
| Total n3                                 | 0.37%                | 0.40%                                  |
| Total n6                                 | 1.31%                | 1.42%                                  |
| Total Mono Unsaturated Fats              | 2.00%                | 2.02%                                  |
| Total Polyunsaturated Fats               | 1.77%                | 1.91%                                  |
| Total Saturated Fats                     | 0.74%                | 0.76%                                  |
| <b>Calculated Total Vitamins</b>         |                      |                                        |
| Vitamin A (Retinol)                      | 19500 IU/kg          | Unchanged                              |
| Vitamin D (Cholecalciferol)              | 2000 IU/kg           | Unchanged                              |
| Vitamin E (a Tocopherol acetate)         | 110 mg/kg            | Unchanged                              |
| Vitamin K (Menadione)                    | 20 mg/kg             | Unchanged                              |
| Vitamin C (Ascorbic acid)                | No data              | Unchanged                              |
| Vitamin B1 (Thiamine)                    | 80 mg/kg             | Unchanged                              |
| Vitamin B2 (Riboflavin)                  | 30 mg/kg             | Unchanged                              |
| Niacin (Nicotinic acid)                  | 145 mg/kg            | Unchanged                              |
| Vitamin B6 (Pryridoxine)                 | 28 mg/kg             | Unchanged                              |
| Pantothenic Acid                         | 60 mg/kg             | Unchanged                              |
| Biotin                                   | 410 ug/kg            | Unchanged                              |
| Folic Acid                               | 5 mg/kg              | Unchanged                              |
| Inositol                                 | No data              | Unchanged                              |
| Vitamin B12 (Cyancobalamin)              | 150 ug/kg            | Unchanged                              |
| Choline                                  | 1600 mg/kg           | Unchanged                              |

**Table S2: Relative Expression Data for All Genes Analyzed**

Expressed as medians (Interquartile Ranges) relative to WT Control Diet (set to 1). Human homologs or alternative gene names are given in parentheses after mouse gene name.

| <b>Genotype</b>                                  | <b>WT</b>        | <b>WT</b>        | <b>MetS-Tg</b>   | <b>MetS-Tg</b>    | <b><i>P</i> Genotype</b> | <b><i>P</i> Diet</b> | <b><i>P</i> Geno*diet</b> |
|--------------------------------------------------|------------------|------------------|------------------|-------------------|--------------------------|----------------------|---------------------------|
| <b>Diet</b>                                      | <b>Control</b>   | <b>Walnut</b>    | <b>Control</b>   | <b>Walnut</b>     |                          |                      |                           |
| <b>Liver</b>                                     |                  |                  |                  |                   |                          |                      |                           |
| <i>Atf6</i> ( <i>ATF6</i> )                      | 1.00 (0.69-1.53) | 1.42 (1.22-2.07) | 1.20 (0.93-1.61) | 1.93 (1.26-3.53)  |                          | 0.005                |                           |
| <i>Ddit3</i> ( <i>CHOP</i> )                     | 1.00 (0.41-1.50) | 1.59 (1.13-3.17) | 1.11 (0.52-1.87) | 2.45 (0.80-5.76)  |                          | 0.002                |                           |
| <i>Eif2ak3</i> ( <i>PERK</i> )                   | 1.00 (0.53-1.46) | 1.98 (1.33-2.26) | 0.84 (0.63-1.86) | 1.88 (1.09-3.07)  |                          | <0.001               |                           |
| <i>Colla1</i> ( <i>COL1A1</i> )                  | 1.00 (0.68-1.45) | 0.54 (0.35-0.99) | 0.97 (0.40-1.50) | 2.61 (1.26-4.30)  | 0.004                    |                      | 0.002                     |
| <i>Hgf</i> ( <i>HGF</i> )                        | 1.00 (0.69-1.34) | 1.72 (1.39-2.35) | 0.82 (0.58-1.66) | 1.50 (1.01-3.15)  |                          | 0.001                |                           |
| <i>Lum</i> ( <i>LUM</i> , <i>Lumican</i> )       | 1.00 (0.34-2.39) | 0.83 (0.38-1.59) | 0.58 (0.32-1.51) | 1.60 (0.59-3.85)  |                          |                      |                           |
| <i>Spp1</i> ( <i>SPPI</i> , <i>Osteopontin</i> ) | 1.00 (0.54-1.83) | 0.95 (0.75-1.38) | 1.27 (0.34-2.41) | 1.63 (0.58-4.67)  |                          |                      |                           |
| <i>Sp1</i> ( <i>SPI</i> )                        | 1.00 (0.71-1.48) | 1.51 (1.42-2.16) | 0.94 (0.55-1.84) | 1.50 (0.78-2.74)  |                          | 0.011                |                           |
| <i>Tgfb</i> ( <i>TGFB1</i> )                     | 1.00 (0.47-1.96) | 0.65 (0.49-1.63) | 1.51 (0.49-2.22) | 2.00 (1.20-4.80)  | 0.007                    |                      |                           |
| <i>Timp1</i> ( <i>TIMP1</i> )                    | 1.00 (0.46-1.74) | 0.67 (0.43-1.11) | 0.99 (0.41-2.14) | 3.54 (1.58-6.37)  | <0.001                   | 0.018                | 0.003                     |
| <i>Tnf</i> ( <i>TNF</i> )                        | 1.00 (0.38-2.31) | 1.18 (0.94-1.56) | 1.87 (0.55-3.64) | 3.52 (1.28-12.15) | 0.002                    | 0.021                |                           |
| <i>Sod1</i> ( <i>SOD1</i> , <i>ALS</i> )         | 1.00 (0.67-1.40) | 0.98 (0.67-1.70) | 1.00 (0.49-1.60) | 2.43 (0.60-4.21)  |                          |                      |                           |
| <i>Bbc3</i> ( <i>PUM</i> , <i>BBC3</i> )         | 1.00 (0.52-1.64) | 0.87 (0.51-1.52) | 0.64 (0.41-1.27) | 1.46 (0.51-2.25)  |                          |                      |                           |
| <i>Fabp1</i> ( <i>FABP1</i> )                    | 1.00 (0.62-1.29) | 0.85 (0.71-1.46) | 0.67 (0.40-1.80) | 1.91 (1.30-3.64)  |                          | 0.028                |                           |
| <i>Ptpn22</i> ( <i>PTPN22</i> )                  | 1.00 (0.36-1.58) | 0.87 (0.60-2.61) | 1.30 (0.83-1.99) | 5.29 (1.67-11.21) | <0.001                   | <0.001               |                           |
| <i>Pparg</i> ( <i>PPARG</i> )                    | 1.00 (0.42-1.94) | 1.03 (0.68-1.28) | 1.61 (0.73-2.84) | 5.02 (3.12-7.53)  | <0.001                   | 0.029                | 0.016                     |
| <i>Il6</i> ( <i>IL6</i> )                        | 1.00 (0.55-2.01) | 1.35 (0.71-2.01) | 0.92 (0.49-2.25) | 1.68 (0.81-5.62)  |                          |                      |                           |
| <i>Insr</i> ( <i>INSR</i> )                      | 1.00 (0.61-1.33) | 1.38 (0.87-1.86) | 0.65 (0.50-1.05) | 1.30 (1.13-2.31)  |                          | <0.001               |                           |
| <i>Slc2a4</i> ( <i>Glut4</i> )                   | 1.00 (0.49-1.38) | 0.46 (0.21-0.72) | 0.92 (0.09-4.99) | 0.91 (0.31-1.43)  |                          |                      |                           |
| <b>Kidney</b>                                    |                  |                  |                  |                   |                          |                      |                           |
| <i>Cst3</i> ( <i>CST3</i> , <i>cystatin C</i> )  | 1.00 (0.61-1.97) | 0.74 (0.63-1.12) | 1.14 (0.56-1.76) | 0.84 (0.49-1.73)  |                          |                      |                           |
| <i>Havcr1</i> ( <i>HAVCR1</i> , <i>Kim1</i> )    | 1.00 (0.65-2.34) | 0.45 (0.14-1.10) | 0.20 (0.06-0.37) | 0.07 (0.03-0.68)  | 0.001                    |                      |                           |

|                                   |                  |                  |                  |                  |       |       |       |
|-----------------------------------|------------------|------------------|------------------|------------------|-------|-------|-------|
| <i>Serpine 1 (SERPINE1, Pai1)</i> | 1.00 (0.53-1.73) | 1.13 (0.77-1.82) | 0.65 (0.49-1.13) | 1.93 (1.11-2.37) |       | 0.028 | 0.042 |
| <i>Tgfb (TGFB1)</i>               | 1.00 (0.55-1.66) | 0.82 (0.60-1.16) | 0.90 (0.64-1.81) | 0.88 (0.67-1.85) |       |       |       |
| <i>Col3a (COL3a)</i>              | 1.00 (0.68-1.85) | 0.68 (0.37-1.05) | 1.03 (0.60-1.73) | 0.76 (0.55-1.33) |       | 0.040 |       |
| <i>Mif (MIF)</i>                  | 1.00 (0.76-1.69) | 1.05 (0.53-1.55) | 0.50 (0.31-1.18) | 0.80 (0.42-1.15) | 0.026 |       |       |
| <i>Trp53 (TP53, p53)</i>          | 1.00 (0.72-2.08) | 0.91 (0.66-2.15) | 1.16 (0.71-2.84) | 1.94 (1.16-2.55) |       |       |       |
| <b>Cardiac Ventricle</b>          |                  |                  |                  |                  |       |       |       |
| <i>Colla1 (COL1A1)</i>            | 1.00 (0.52-1.91) | 0.98 (0.32-2.11) | 0.79 (0.36-1.50) | 0.62 (0.44-0.85) |       |       |       |
| <i>Tgfb (TGFB1)</i>               | 1.00 (0.68-3.75) | 1.62 (0.59-3.91) | 0.80 (0.34-2.68) | 0.98 (0.35-1.11) |       |       |       |
| <i>Col3a1 (COL3a1)</i>            | 1.00 (0.70-1.63) | 1.40 (0.43-2.08) | 0.84 (0.34-1.71) | 0.59 (0.38-0.88) |       |       |       |
| <i>Fabp4 (FABP4)</i>              | 1.00 (0.60-1.56) | 1.17 (0.37-2.87) | 0.59 (0.26-1.64) | 0.78 (0.34-1.43) |       |       |       |
| <i>Mif (MIF)</i>                  | 1.00 (0.28-4.14) | 0.60 (0.15-4.47) | 0.38 (0.06-0.78) | 0.26 (0.14-0.85) | 0.022 |       |       |
| <i>Myh7b (MYH7B)</i>              | 1.00 (0.59-3.10) | 2.07 (0.61-2.40) | 0.56 (0.35-2.01) | 0.84 (0.32-1.61) |       |       |       |
| <i>Trp53 (TP53, p53)</i>          | 1.00 (0.52-1.87) | 1.56 (0.46-2.54) | 0.93 (0.50-1.55) | 0.75 (0.52-1.08) |       |       |       |
